# Supplementary material
Source: PubMed Central journal article supplement (PMC2692529)
Supplement: NIHMS108065-supplement-01.pdf [file NIHMS108065-supplement-01.pdf]

Supplemental Data

An Essential Role of the Forkhead-Box  
Transcription Factor Foxo1 in Control  
of T Cell Homeostasis and Tolerance

Weiming Ouyang, Omar Beckett, Richard A. Flavell, and Ming O. Li

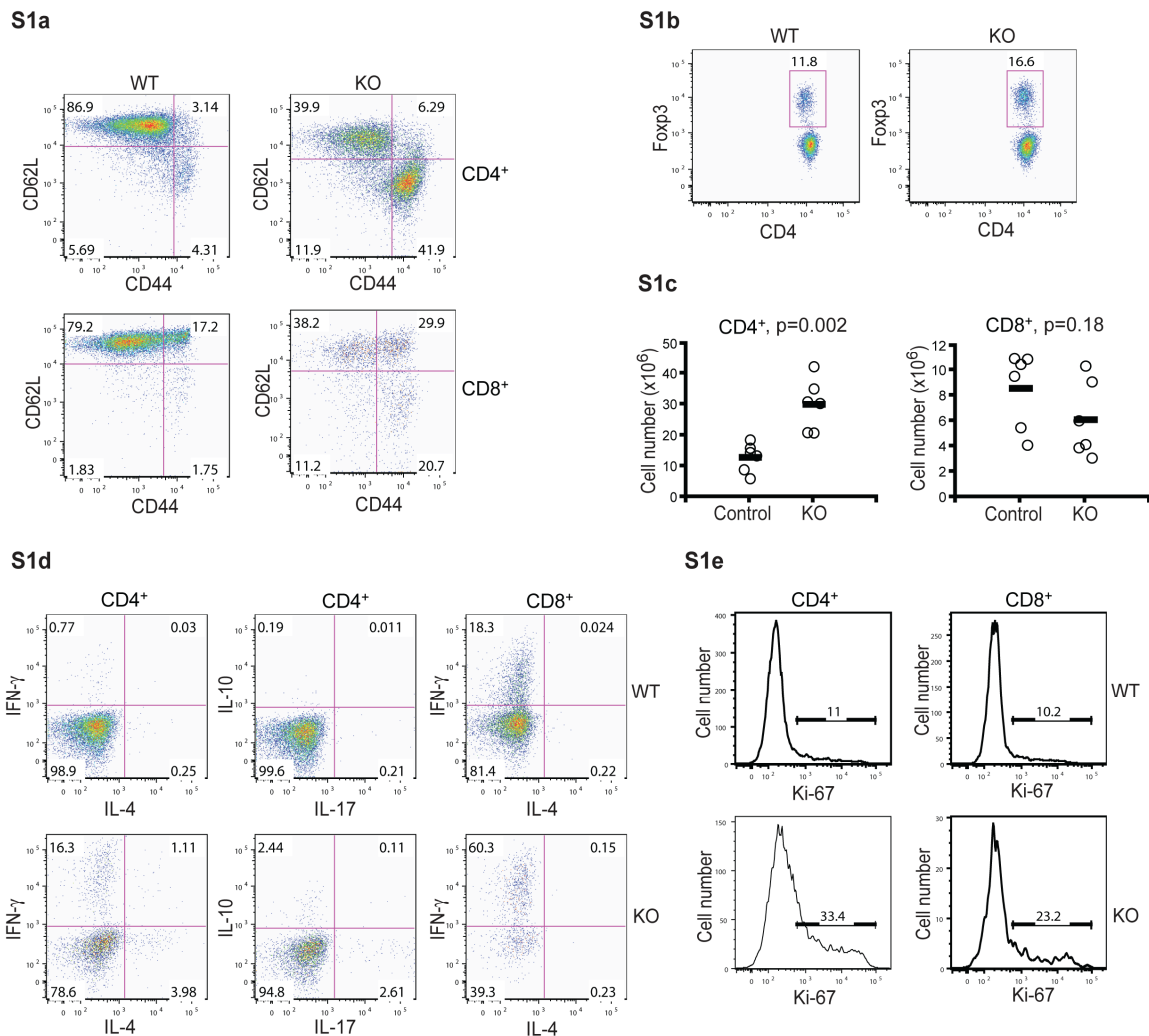

**Figure S1. Analysis of Foxo1-deficient T Cells in the Mesenteric Lymph Nodes**

(a) Expression of CD44 and CD62L in CD4<sup>+</sup> and CD8<sup>+</sup> T cells from the mesenteric lymph nodes (mLNs) of Foxo1/Foxo1 (wild-type, WT) and CD4Cre-Foxo1/Foxo1 (knockout, KO) mice at 6 weeks old. These are representative results of six independent experiments.

(b) Percentage of mLN CD4<sup>+</sup>Foxp3<sup>+</sup> regulatory T (Treg) cells from WT and KO mice at 6 weeks old.

## **Immunity, Volume 30**

(c) Number of mLN CD4<sup>+</sup> and CD8<sup>+</sup> T cells from control (Foxo1/Foxo1) and KO mice aged between 6 and 8 weeks (n=6). The p values between the cell number of the two groups of mice are shown.

(d) CD4<sup>+</sup> and CD8<sup>+</sup> T cells isolated from the mLNs of WT and KO mice were stimulated with PMA and ionomycin for 4 hr and analyzed for the expression of IFN- $\gamma$ , IL-4, IL-10, and IL-17 by intracellular cytokine staining. These are representative results of two independent experiments.

(e) Expression of Ki-67 in CD4<sup>+</sup> and CD8<sup>+</sup> T cells from the mLNs of WT and KO mice aged between 6 and 8 weeks.

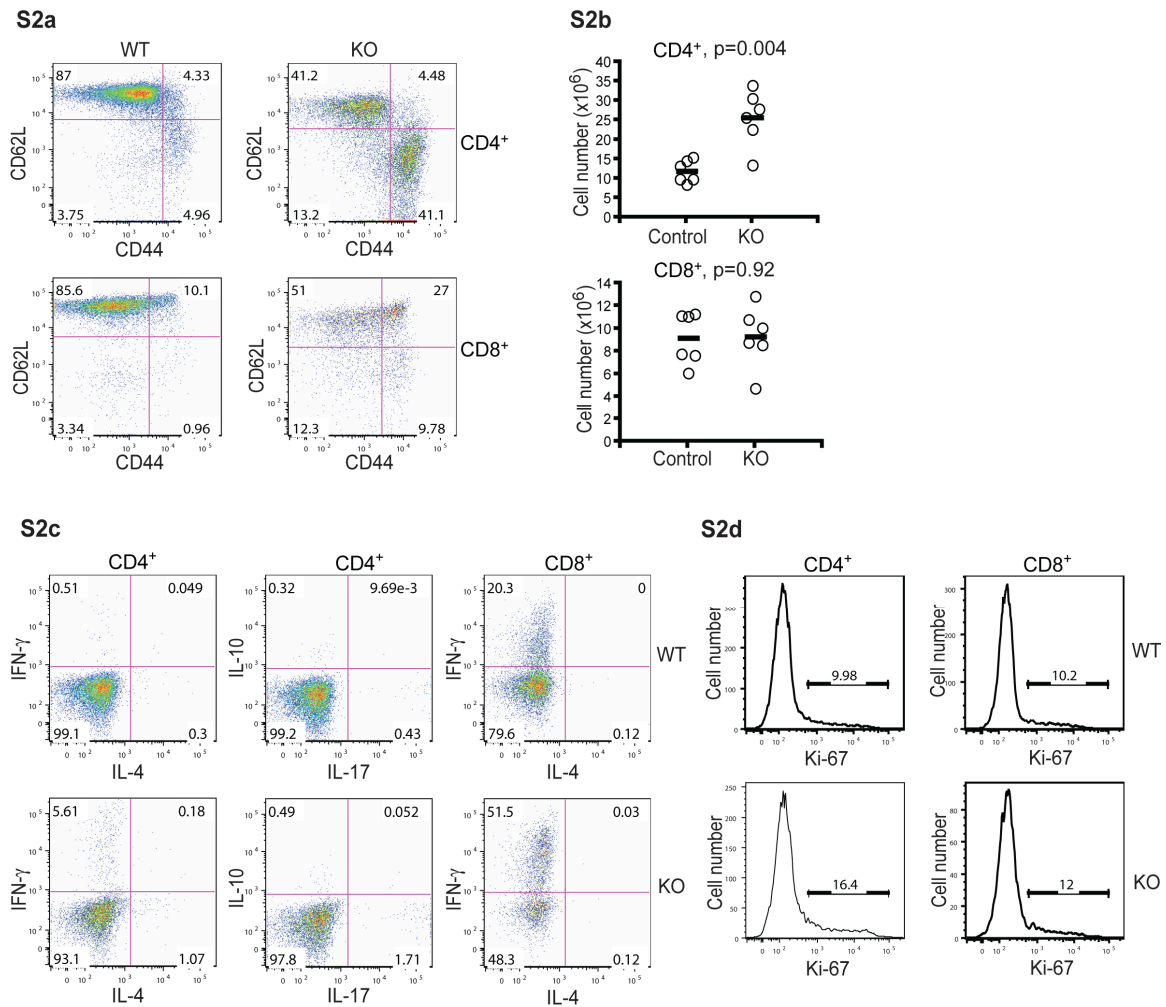

**Figure S2. Analysis of Foxo1-deficient T Cells in the Peripheral Lymph Nodes**

(a) Expression of CD44 and CD62L in CD4<sup>+</sup> and CD8<sup>+</sup> T cells from the peripheral lymph nodes (pLNs) of Foxo1/Foxo1 (wild-type, WT) and CD4Cre-Foxo1/Foxo1 (knockout, KO) mice at 6 weeks old. These are representative results of six independent experiments.

(b) Number of pLN CD4<sup>+</sup> and CD8<sup>+</sup> T cells from control (Foxo1/Foxo1) and KO mice aged between 6 and 8 weeks (n=6). The p values between the cell number of the two groups of mice are shown.

(c) CD4<sup>+</sup> and CD8<sup>+</sup> T cells isolated from the pLNs of WT and KO mice were stimulated with PMA and ionomycin for 4 hr and analyzed for the expression of IFN- $\gamma$ , IL-4, IL-10, and IL-17 by intracellular cytokine staining. These are representative results of two independent experiments.

(d) Expression of Ki-67 in CD4<sup>+</sup> and CD8<sup>+</sup> T cells from the pLNs of WT and KO mice aged between 6 and 8 weeks.

S3

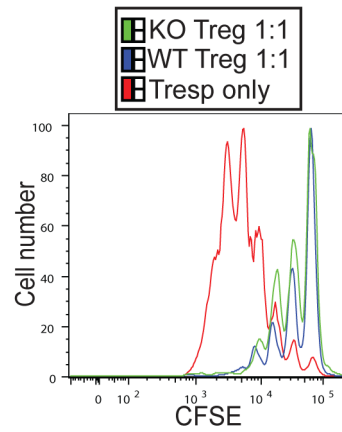

**Figure S3. Suppressive Function of Foxo1-deficient Treg Cells**

CD4<sup>+</sup>Foxp3<sup>+</sup> regulatory T cells (Treg) were isolated from Foxo1/Foxo1 (wild-type, WT) and CD4Cre-Foxo1/Foxo1 (knockout, KO) mice. The CD44<sup>lo</sup>CD4<sup>+</sup> cells from WT mice were labeled with CFSE and used as responder T cells (Tresp). The suppression was shown by comparison of CFSE dilution in the Tresp cells cultured with or without 1:1 Treg cells.

S4

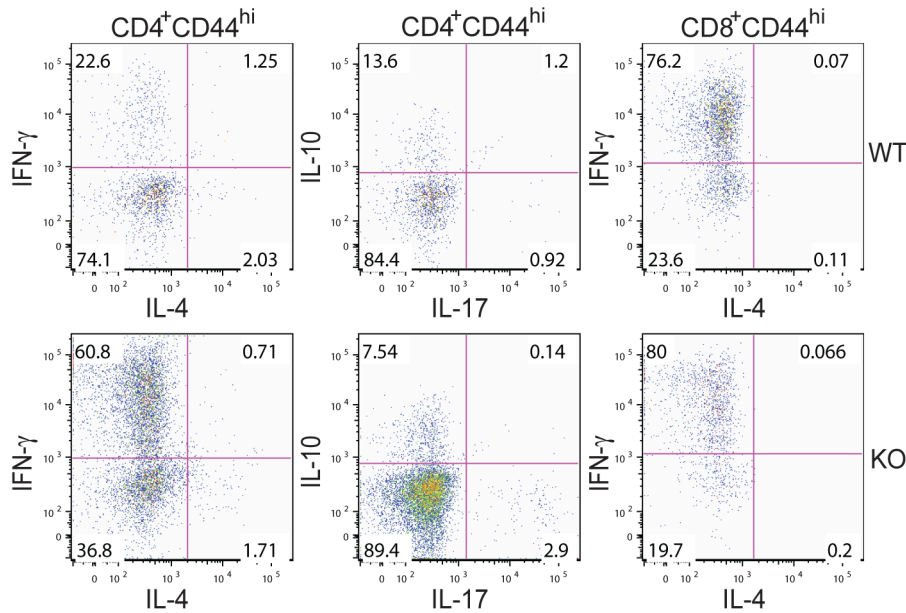

**Figure S4. Cytokine Production by CD44<sup>hi</sup> T cells**

T cells isolated from the spleens of Foxo1/Foxo1 (wild-type, WT) and CD4Cre-Foxo1/Foxo1 (knockout, KO) mice were stimulated with PMA and ionomycin for 4 hr and analyzed for the expression of IFN- $\gamma$ , IL-4, IL-10, and IL-17 in CD44<sup>hi</sup>CD4<sup>+</sup> and CD44<sup>hi</sup>CD8<sup>+</sup> T cells. These are representative results of two independent experiments.

S5

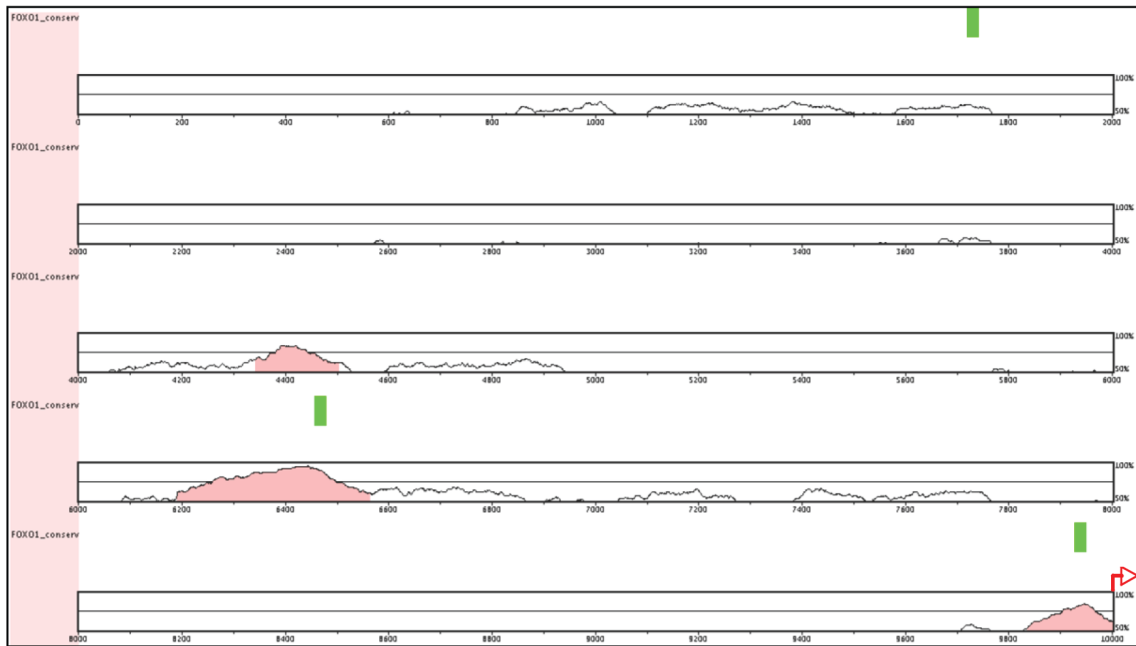

**Figure S5. Potential Foxo1-Binding Sites in the Promoter Region of *IL7r* Gene**

The conserved putative Foxo1-binding sites in the *IL7r* locus were analyzed by rVISTA online (<http://genome.lbl.gov/vista/rvista/submit.shtml>). Ten kilobase pairs (10 kb) of nucleotides upstream of transcription start site (indicated by red arrow) from mouse and human *IL7r* genes were used for rVISTA analysis. Three conserved non-coding sequences (CNSs, marked by pink color), and three conserved Foxo1 binding sites (shown as green bars) were depicted.

S6

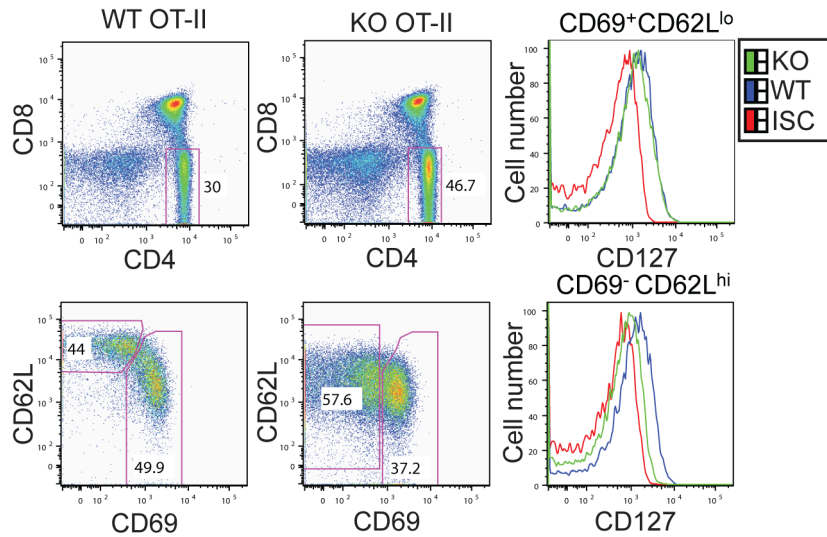

**Figure S6. Development of Foxo1-deficient OT-II T cells**

Thymic CD4 and CD8 profile of Foxo1/Foxo1 (wild-type, WT) and CD4Cre-Foxo1/Foxo1 (knockout, KO) OT-II mice at 8 weeks old (top left). Expression of CD69 and CD62L in CD4<sup>+</sup> OT-II thymocytes from WT and KO mice (bottom left). Expression of CD127 (IL-7R) in immature (CD69<sup>+</sup>CD62L<sup>lo</sup>) and mature (CD69<sup>-</sup>CD62L<sup>hi</sup>) CD4<sup>+</sup> OT-II thymocytes from WT and KO mice. ISC stands for the iso-type control antibody. These are representative results of four mice per group analyzed.

S7a

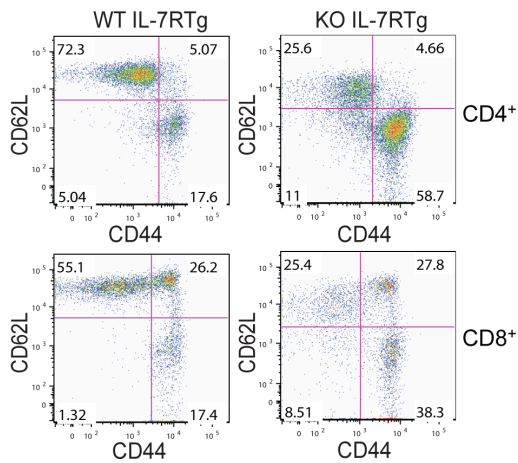

S7b

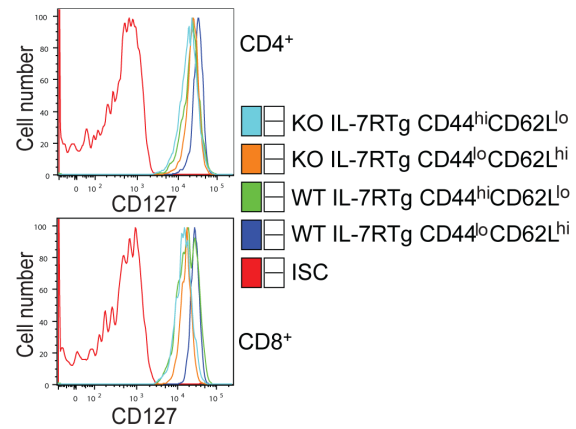

**Figure S7. Expression of CD44, CD62L, and CD127 in T cells on IL-7R Transgenic Background**

**(a)** CD4<sup>+</sup> and CD8<sup>+</sup> T cells from the spleens of Foxo1/Foxo1 (wild-type, WT) IL-7RTg and CD4Cre-Foxo1/Foxo1 (knockout, KO) IL-7RTg mice at 8 weeks old were stained with CD44 and CD62L antibodies and analyzed by flow cytometry.

**(b)** Expression of CD127 in splenic CD44<sup>lo</sup>CD62L<sup>hi</sup> and CD44<sup>hi</sup>CD62L<sup>lo</sup> T cells from WT IL-7RTg and KO IL-7RTg mice. These are representative results of two independent experiments.
